# Supplementary material for: Cannabinoids For Fibromyalgia: An Updated Systematic Review
Source: bioRxiv or medRxiv preprint supplement (doi:10.1101/2022.05.17.22275200), 2022-05-20
Supplement: Supplementary file [file media-1.pdf]

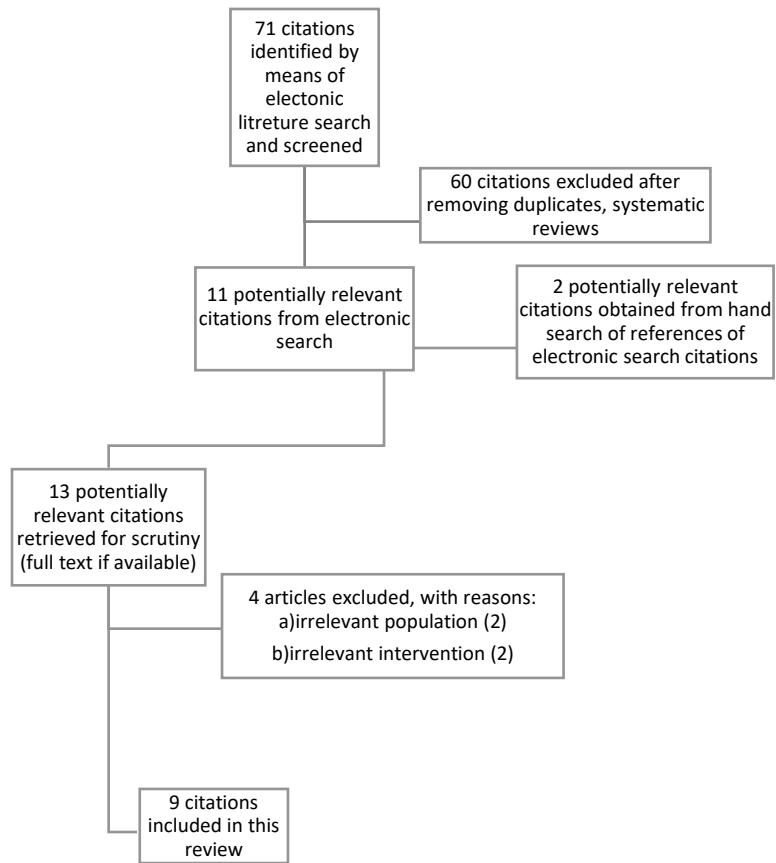

**Figure 1**

Study flow diagram.
